# Supplementary material for: Natural carbon nanodots assisted development of size-tunable metal (Pd, Ag) nanoparticles grafted on bionic dendritic α-Fe2O3 for cooperative catalytic applications
Source: Royal Society of Chemistry journal article supplement (doi:10.1039/c5ta05425g), 2015-01-01
Supplement: c5ta05425g1.pdf [file c5ta05425g1.pdf]

**Natural Carbon Nanodots Assisted Development of Size-Tunable Metal (Pd, Ag)  
Nanoparticles Grafted on Bionic Dendritic  $\alpha$ -Fe<sub>2</sub>O<sub>3</sub> for Cooperative Catalytic Applications**

Zhifeng Jiang,<sup>a</sup> Deli Jiang,<sup>a</sup> Wei Wei<sup>b</sup>, Zaoxue Yan<sup>a</sup>, and Jimin Xie<sup>\*a</sup>

<sup>a</sup>School of Chemistry and Chemical Engineering, Jiangsu University, Zhenjiang, 212013, P. R. China

<sup>b</sup>Analysis and Test Center, Jiangsu University, Zhenjiang, 212013, P. R. China

**First Author e-mail address:** [ntjiangzf@sina.com](mailto:ntjiangzf@sina.com)

**\*Corresponding author:** Jimin Xie

Tel.: +86 11 88791708; fax: +86 11 88791800;

E-mail address: [xiejm391@sohu.com](mailto:xiejm391@sohu.com)

## Supporting Information

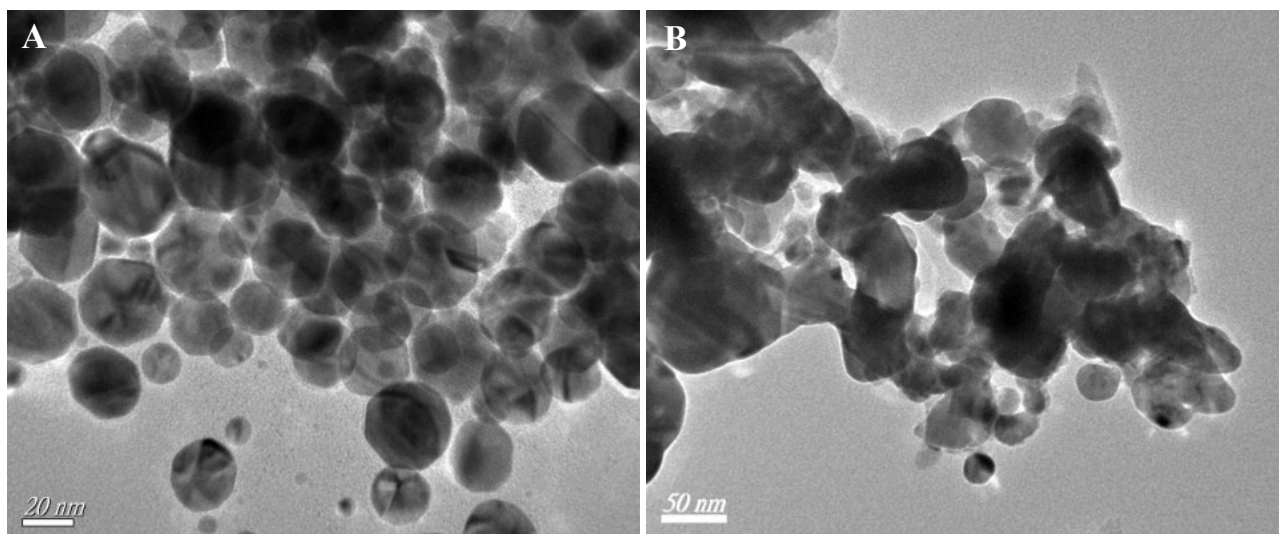

**Fig. S1 (A) Pure Pd nanoparticles, (B) pure Ag nanoparticles.**

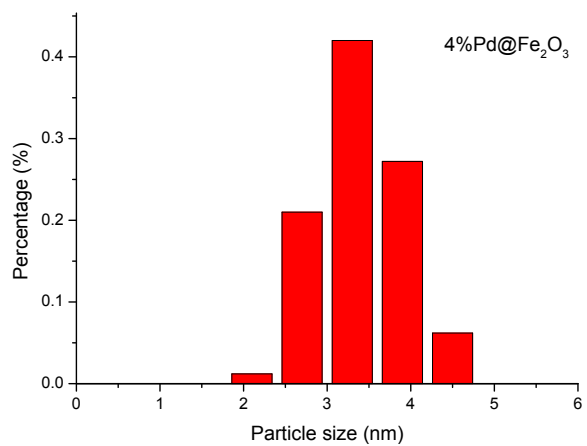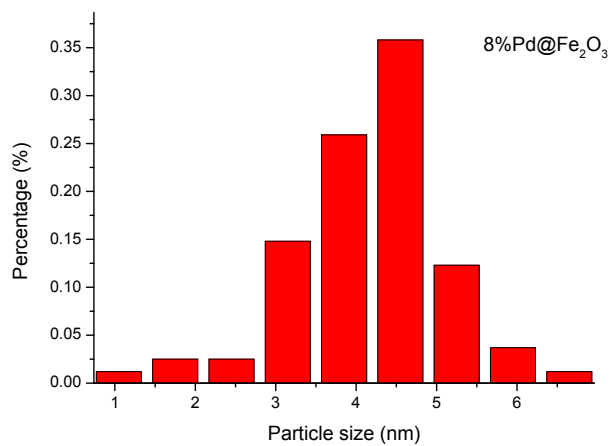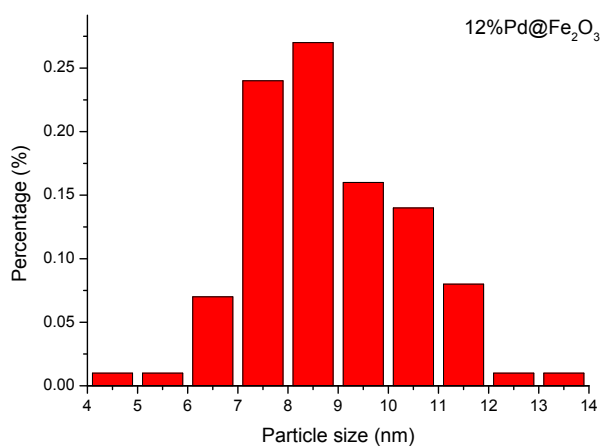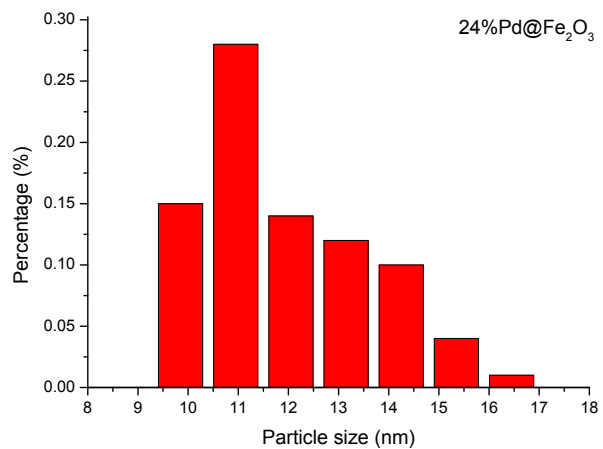

**Fig. S2** Size distribution of Pd nanoparticles.

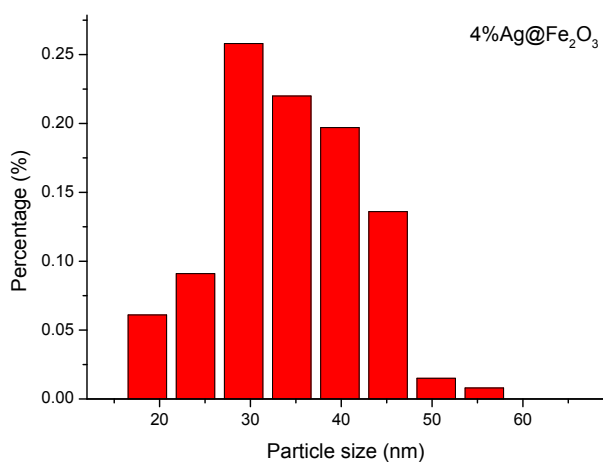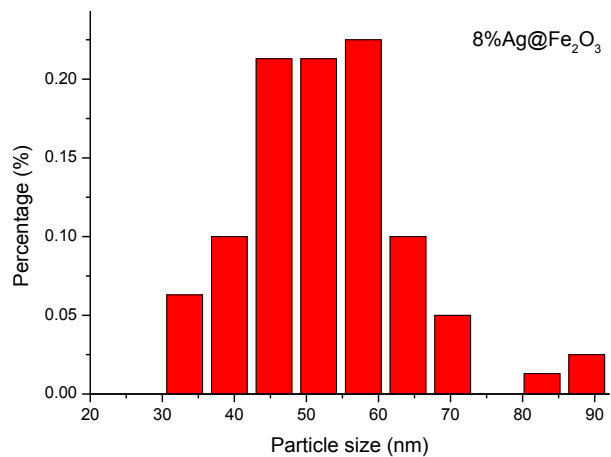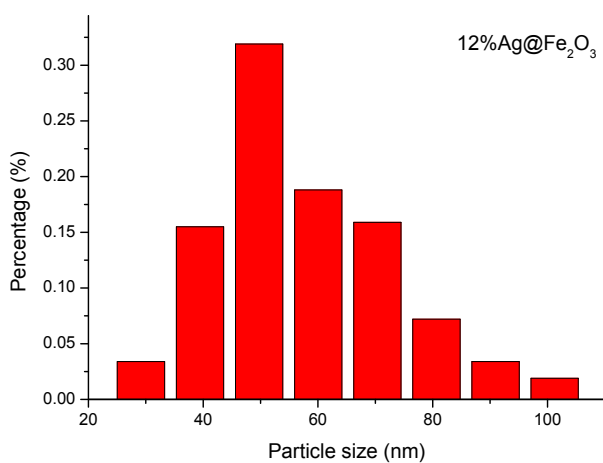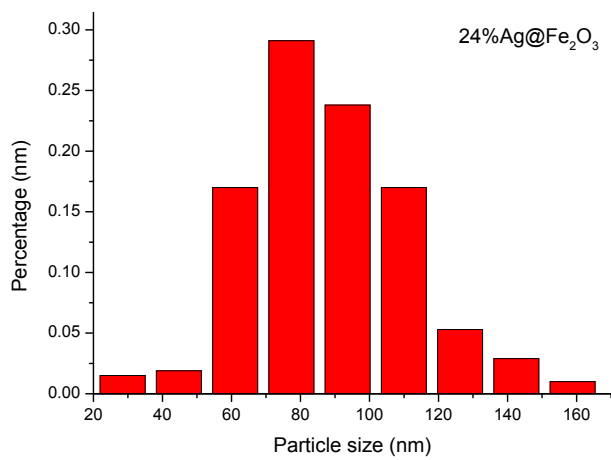

**Fig. S3** Size distribution of Ag nanoparticles.

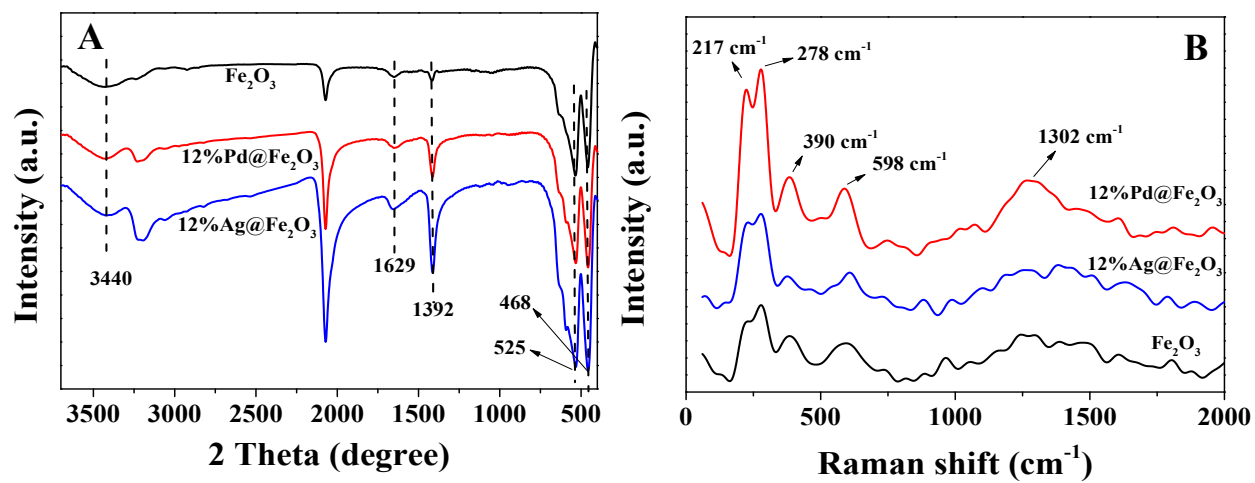

Fig. S4 FTIR (A) and Raman (B) spectra of dendritic  $\alpha$ - $\text{Fe}_2\text{O}_3$ , 12%Pd@ $\text{Fe}_2\text{O}_3$  and 12%Ag@ $\text{Fe}_2\text{O}_3$ .

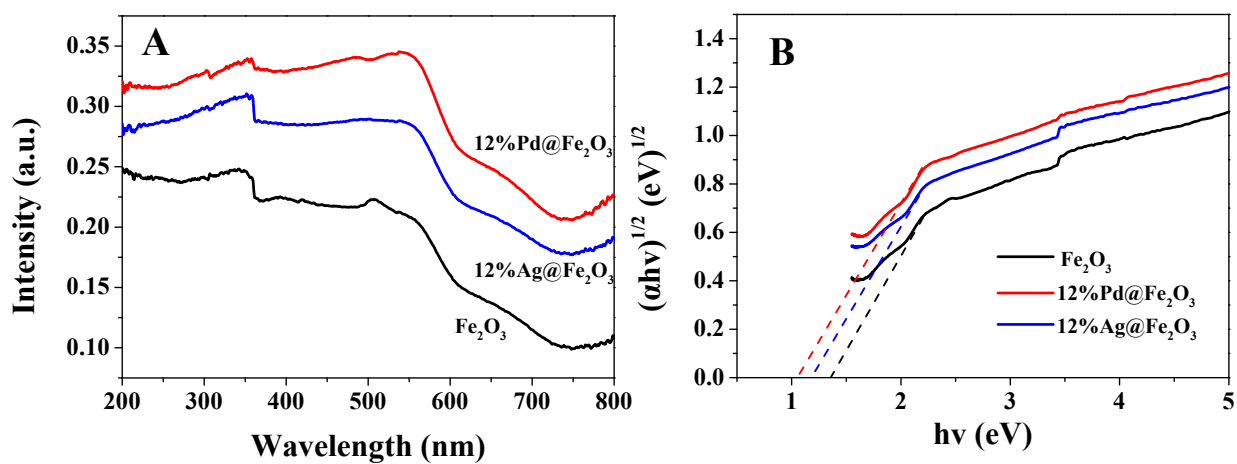

**Fig. S5** UV-vis diffuse reflectance spectra (A) and band gaps (B) of the  $M@Fe_2O_3$  ( $M=\text{Pd}, \text{Ag}$ ) composites as well as dendritic  $\alpha\text{-Fe}_2\text{O}_3$ .

**Table S1**

| Catalyst                                                              | Catalyst dose               | PNP                               | Rate                                  | Ref. |
|-----------------------------------------------------------------------|-----------------------------|-----------------------------------|---------------------------------------|------|
| Fe <sub>3</sub> O <sub>4</sub> @SiO <sub>2</sub> -Ag,<br>1g (0.1 wt%) | 1g (0.1 wt%)                | 0.12 mM                           | 7.67 s <sup>-1</sup> g <sup>-1</sup>  | 1    |
| Ag@halloysite nanotubes,<br>6*10 <sup>-6</sup> M, 20 mL               | 6*10 <sup>-6</sup> M, 20 mL | 6*10 <sup>-5</sup> M              | 0.087 s <sup>-1</sup> g <sup>-1</sup> | 2    |
| Ag@carbon sphere,<br>1 mg                                             | 1 mg                        | 5*10 <sup>-5</sup> M              | 1.69 s <sup>-1</sup> g <sup>-1</sup>  | 3    |
| Ag@hollow poly(N-<br>isopropylacrylamide) sohere,<br>0.5 g            | 0.5 g                       | 0.32 mg,<br>50 g H <sub>2</sub> O | 0.014 s <sup>-1</sup> g <sup>-1</sup> | 4    |
| Ni-Co-Pd-P                                                            | 25 mg                       | 0.05 mmol                         | 0.316 s <sup>-1</sup> g <sup>-1</sup> | 5    |
| Ag/Fe <sub>2</sub> O <sub>3</sub>                                     | 2 mg                        | 2.65*10 <sup>-5</sup> M           | 1.54 s <sup>-1</sup> g <sup>-1</sup>  | 6    |
| Fe <sub>3</sub> O <sub>4</sub> @SiO <sub>2</sub> /Ag                  | 3 mg                        | 0.005 M                           | 4.6 s <sup>-1</sup> g <sup>-1</sup>   | 7    |
| Fe@Au-ATPGO                                                           | 1.4g/L, 250 mL              | 0.06 M                            | 0.035 s <sup>-1</sup> g <sup>-1</sup> | 8    |
| Ag/SBA-15                                                             | 0.9 mg                      | 9.0 × 10 <sup>-2</sup> mM         | 1.97 s <sup>-1</sup> g <sup>-1</sup>  | 9    |

- (1) Y. Chi, Q. Yuan, Y. Li, J. Tu, L. Zhao, N. Li and X. Li, *J. Colloid Interface Sci.*, 2012, 383, 96-102.
- (2) P. Liu and M. Zhao, *Appl. Surf. Sci.*, 2009, 255, 3989-3993.
- (3) S. Tang, S. Vongehr and X. Meng, *J. Phys. Chem. C*, 2010, 114, 977-982
- (4) L. Xie, M. Chen and L. Wu, *J. Polym. Sci., Part A: Polym. Chem.*, 2009, 47, 4919-4924.
- (5) P. Yang, A. Xua, J. Xia, J. He, H. Xing, X. Zhang, S. Wei and N. Wang, *App. Catal. A*, 2014, 470, 89-96
- (6) J. Chiou, B. Lai, K. Hsu and D. Chen, *J. Hazard. Mater.* 2013, 248-249, 394-400.
- (7) X. Du, J. He, J. Zhu, L. Sun and S. An, *Appl. Surf. Sci.*, 2012, 258, 2717-2723.
- (8) V. Gupta, N. Atar, M. Yola, Z. Üstündağ and L. Uzun, *Water Res.*, 2014, 48, 210-217.
- (9) B. Naik, S. Hazra, V. S. Prasad and N. N. Ghosh, *Catal. Commun.*, 2011, 12, 1104-1108.
